# Supplementary material for: HP1 proteins compact DNA into mechanically and positionally stable phase separated domains
Source: eLife. 2021 Mar 4;10:e64563. doi: 10.7554/eLife.64563 (PMC7932698; doi:10.7554/eLife.64563)
Supplement: Supplementary file 2. — Chromodomains (CD) and chromoshadow domains (CSD) are indicated in bold. A 6xHis tag followed by TEV cleavage site tag (MGHHHHHHDYDIPTTENLYFQGS) was appended to each construct for purification. [file elife-64563-supp2.xlsx]

## Sheet: 601Final results180821 analyzed
	DNA concentration (ng/ul)	HP1 concentration (uM)	Mean Radii	Expectation Value Radii	Mean area	Expectation value Area	Number of Droplets Analyzed	Number of Frames
0	400	400	3.36613	3.9764	59.5851	60.4876	54355	13
0	400	200	4.75544	5.37819	132.923	133.339	14916	12
0	400	100	4.37122	5.43926	143.153	143.75	4707	10
0	400	50	0.909686	1.93764	2.70187	3.25342	1133	6
0	400	25	0.954905	1.51214	3.01154	3.39777	112	6
0	200	400	3.48148	3.88882	57.175	57.4774	64708	12
0	200	200	3.08179	3.87977	39.7546	40.3776	67319	11
0	200	100	3.86489	4.32588	86.6486	86.9636	15800	11
0	200	50	1.13458	1.49161	5.3348	6.11036	7680	8
0	200	25	1.13711	2.00732	5.99336	6.22468	0	6
0	100	400	4.18601	4.22896	101.031	101.839	43277	11
0	100	200	3.51419	3.64733	69.5859	69.9271	44997	10
0	100	100	3.1433	3.78247	51.2208	51.9016	48835	10
0	100	50	2.92461	3.80286	36.4696	37.1453	41875	10
0	100	25	0.736102	1.94568	1.79986	2.23255	0	6
0	50	400	3.95311	4.22323	71.0471	71.3072	30094	8
0	50	200	3.46168	4.01999	50.3625	50.596	39371	8
0	50	100	3.06995	3.69545	38.0763	38.8649	47878	8
0	50	50	2.50631	3.28018	25.1786	25.9076	62147	9
0	50	25	1.30185	1.51401	7.9749		7.94873	0	6
0	25	400	2.71455	3.3682	27.7068	28.2278	160258	13
0	25	200	2.44247	2.92203	22.0805	22.5764	187025	13
0	25	100	2.51818	2.65876	23.7538	24.6043	120945	11
0	25	50	1.98636	2.28665	14.9686	15.4424	58194	7
0	25	25	0.949284	1.5783	4.15573	4.66684	0	6
0	12.5	400	1.90284	2.88426	13.0299	13.4268	208464	11
0	12.5	200	1.64529	1.67758	9.76777	10.08	71250	6
0	12.5	100	1.59442	2.05241	9.53244	10.0628	149601	10
0	12.5	50	1.62717	2.30915	9.89318	10.1817	103638	8
0	12.5	25	1.07324	2.06586	5.08428	5.68011	0	7
0	6.25	400	1.36913	1.93286	6.53235	7.17572	361501	13
0	6.25	200	1.32656	1.71803	6.30374	6.94137	153048	9
0	6.25	100	1.3239	1.85619	6.50867	7.23089	119520	9
0	6.25	50	1.29636	1.47728	6.31331	6.42096	136304	9
0	6.25	25	0.907767	2.02837	3.06733	3.57779	17104	8
0	3.125	400	1.10273	1.35519	4.49325	5.17382	93141	7
0	3.125	200	1.11389	1.83141	4.46236	5.39767	124208	9
0	3.125	100	1.11199	1.34595	4.42698	4.82927	70266	8
0	3.125	50	1.09025	1.72976	4.33878	4.89905	63901	7
0	3.125	25	1.13855	2.00495	4.68668	4.83728	4374	8
0	1.56	400	0.981346	1.68957	3.23343	4.12112	66164	9
0	1.56	200	0.828586	1.75807	2.30339	2.28191	64036	8
0	1.56	100	0.871564	1.90039	2.61273	2.73332	25978	6
0	1.56	50	0.953087	1.31031	3.10102	3.63653	46283	8
0	1.56	25	0.892384	1.89385	2.68113	2.9924	4651	6
